# Supplementary material
Source: PubMed Central journal article supplement (PMC10929571)
Supplement: NIHMS1969013-supplement-1.pdf [file NIHMS1969013-supplement-1.pdf]

## A Notes on ICD Code Preprocessing

In CAML’s preprocessing pipeline, there are two errors. Firstly, when they load the `DIAGNOSES_ICD` and `PROCEDURES_ICD` tables into Pandas dataframes, the ICD codes are loaded without specifying a data type, `dtype` in the `pd.read_csv()` method, resulting in the loss of some of leading zeros (e.g. `0040`  $\rightarrow$  `40`). This affects more than 190 codes out of 8930 in MIMIC-III. Also, when they store the converted ICD codes (with period) into a file and re-read it, data type is not specified, resulting in that some of the codes are converted as floating number and lose leading and trailing zeros. This also affects many ICD codes. For example, a major top-50 ICD code, `93.90` is not selected.

Secondly, MIMIC-III has duplicate ICD codes in the `DIAGNOSES_ICD` and `PROCEDURES_ICD` table,

i.e., an ICD code can be repeated in one admission<sup>7</sup>. While preprocessing, CAML’s code does not remove such duplicate codes, and as a result of this, some ICD codes were selected as top-50 incorrectly.

As a result, CAML’s MIMIC-III full dataset has 8922 labels, while our correctly fixed dataset has 8930 labels. Moreover, our MIMIC-III top-50 dataset has ICD codes `93.90`, `V45.82`, and CAML’s dataset has `33.24`, `45.13` instead.

Table 4 lists the ICD codes in CAML’s, our, and TransICD’s MIMIC-III top-50 datasets. TransICD (Biswas et al., 2021) corrected the first mentioned error, i.e., loading ICD codes incorrectly, but counts duplicate ICD codes when choosing top-50 codes, resulting in another incorrect set of top-50 codes.

## B Sample Configuration File

Figure 4 shows the YAML config files for preprocessing our MIMIC-III full dataset, to show the configurable pipeline of AnEMIC. Users can create their own ICD coding datasets with, for example, different top- $k$  or word stemmer, by customizing options in the config file. Also, for more customized behavior, users can implement submodules of the pipeline – for example, tokenizer and embedding trainer, and register in the `ConfigMapper` to be used in the config file.

## C Reproduction Results on the CAML’s Dataset

In this section, we describe the reproduction experiments and explain the results. To ensure that our framework correctly re-implemented the old, CAML version of the datasets and the key models, we trained the models on the old datasets and compared the results with the ones reported in the papers. As in the benchmark experiments, for each configuration, we ran experiments three times and computed the mean and the standard deviation. To make a fair comparison between the models, we created three sets of the old datasets and used each of them for each run of model training. Effectively, the runs will have different weight initialization, including the embedding matrix.

The results are shown in Table 5 and 6. Overall, our reproduction shows similar performance as reported in the papers and preserves the relative order

<sup>7</sup>For example, ICD code `33.24` appears 11 times in the admission with `HADM_ID=193989`.

| No. | CAML               | TransICD           | AnEMIC             |
|-----|--------------------|--------------------|--------------------|
| 1   | 401.9 20053        | 401.9 20053        | 401.9 20046        |
| 2   | 38.93 14444        | 38.93 14444        | 38.93 12866        |
| 3   | 428.0 12842        | 428.0 12842        | 428.0 12842        |
| 4   | 427.31 12594       | 427.31 12594       | 427.31 12589       |
| 5   | 414.01 12179       | 414.01 12179       | 414.01 12178       |
| 6   | 96.04 9932         | 96.04 9932         | 96.04 9493         |
| 7   | 96.6 9161          | 96.6 9161          | 96.6 9102          |
| 8   | 584.9 8907         | 584.9 8907         | 584.9 8906         |
| 9   | 250.00 8784        | 250.00 8784        | 250.00 8783        |
| 10  | 96.71 8619         | 96.71 8619         | 272.4 8503         |
| 11  | 272.4 8504         | 272.4 8504         | 96.71 8426         |
| 12  | 518.81 7249        | 518.81 7249        | 518.81 7249        |
| 13  | 99.04 7147         | 99.04 7147         | 99.04 7102         |
| 14  | 39.61 6809         | 39.61 6809         | 39.61 6781         |
| 15  | 599.0 6442         | 599.0 6442         | 599.0 6442         |
| 16  | 530.81 6156        | 530.81 6156        | 530.81 6154        |
| 17  | 96.72 5926         | 96.72 5926         | 96.72 5815         |
| 18  | 272.0 5766         | 272.0 5766         | 272.0 5766         |
| 19  | 285.9 5296         | 285.9 5296         | 285.9 5295         |
| 20  | 88.56 5240         | 88.56 5240         | 88.56 5045         |
| 21  | 244.9 4788         | 244.9 4788         | 244.9 4785         |
| 22  | 486 4733           | 486 4733           | 486 4732           |
| 23  | 38.91 4575         | 38.91 4575         | 285.1 4499         |
| 24  | 285.1 4499         | 285.1 4499         | 38.91 4449         |
| 25  | 36.15 4390         | 36.15 4390         | 36.15 4387         |
| 26  | 276.2 4358         | 276.2 4358         | 276.2 4358         |
| 27  | 496 4296           | 496 4296           | 496 4296           |
| 28  | 99.15 4172         | 99.15 4172         | 99.15 4162         |
| 29  | 995.92 3792        | 995.92 3792        | 995.92 3792        |
| 30  | V58.61 3698        | V58.61 3698        | V58.61 3697        |
| 31  | 507.0 3592         | 507.0 3592         | 507.0 3592         |
| 32  | 038.9 3580         | 038.9 3580         | 038.9 3580         |
| 33  | 88.72 3500         | 88.72 3500         | 585.9 3367         |
| 34  | 585.9 3367         | 585.9 3367         | 403.90 3350        |
| 35  | 403.90 3350        | 403.90 3350        | 311 3347           |
| 36  | 311 3347           | 311 3347           | 88.72 3305         |
| 37  | 305.1 3272         | 305.1 3272         | 305.1 3272         |
| 38  | 37.22 3248         | 37.22 3248         | 412 3203           |
| 39  | 412 3203           | 412 3203           | 37.22 3147         |
| 40  | <b>33.24 3188</b>  | <b>33.24 3188</b>  | 39.95 3133         |
| 41  | 39.95 3178         | 39.95 3178         | 287.5 3002         |
| 42  | 287.5 3002         | 287.5 3002         | 410.71 3001        |
| 43  | 410.71 3001        | 410.71 3001        | 276.1 2985         |
| 44  | 276.1 2985         | 276.1 2985         | V45.81 2943        |
| 45  | V45.81 2943        | V45.81 2943        | 424.0 2876         |
| 46  | 424.0 2878         | 424.0 2878         | V15.82 2741        |
| 47  | <b>45.13 2849</b>  | <b>45.13 2849</b>  | 511.9 2693         |
| 48  | V15.82 2741        | V15.82 2741        | <b>93.90 2656</b>  |
| 49  | 511.9 2693         | 511.9 2693         | <b>V45.82 2651</b> |
| 50  | <b>37.23 2659</b>  | <b>37.23 2659</b>  | <b>37.23 2619</b>  |
| 51  | <b>V45.82 2651</b> | <b>37.23 2659</b>  | <b>33.24 2607</b>  |
| 52  | 403.91 2566        | <b>V45.82 2651</b> | 403.91 2566        |
| 53  | V29.0 2529         | 403.91 2566        | <b>45.13 2552</b>  |
| 54  | 424.1 2517         | V29.0 2529         | V29.0 2529         |
| 55  | 785.52 2501        | 424.1 2517         | 424.1 2517         |
| 56  | V58.67 2497        | 785.52 2501        | 785.52 2501        |
| 57  | 427.89 2396        | V58.67 2497        | V58.67 2497        |
| 58  | 327.23 2328        | 427.89 2396        | 427.89 2396        |
| 59  | 997.1 2313         | 327.23 2328        | 327.23 2328        |
| 60  | 99.55 2304         | 997.1 2313         | 997.1 2313         |
| 61  | <b>93.9 2233</b>   | 99.55 2304         | 99.55 2275         |

Table 4: Top-61 frequency ICD codes from differently processed datasets. The frequency of each code to select the top-50 labels is shown next to each code. Note the frequencies of ICD codes are affected by preprocessing method and error. The top-50 ICD codes that are not contained in all three top-50 sets are marked in bold.

of performance among the models, illustrating that our code can be used in the research of automatic ICD coding.

Despite the effort of re-implementing the ex-

```

1 paths:
2   mimic_dir: &mimic_dir datasets/mimic3/csv
3   static_dir: &static_dir datasets/mimic3/static
4   dataset_dir: &dataset_dir datasets/mimic3_full
5   word2vec_dir: &word2vec_dir datasets/mimic3_full/word2vec
6
7 preprocessing:
8   name: mimic_iii_preprocessing_pipeline
9   params:
10    paths:
11     mimic_dir: *mimic_dir
12     static_dir: *static_dir
13     save_dir: *dataset_dir
14     diagnosis_code_csv_name: DIAGNOSES_ICD.csv.gz
15     procedure_code_csv_name: PROCEDURES_ICD.csv.gz
16     noteevents_csv_name: NOTEEVENTS.csv.gz
17     train_json_name: train.json # will be saved
18     val_json_name: val.json # will be saved
19     test_json_name: test.json # will be saved
20     label_json_name: labels.json # will be computed and saved
21     label_freq_json_name: null
22   dataset_metadata:
23     column_names:
24      subject_id: SUBJECT_ID
25      hadm_id: HADM_ID
26      chartdate: CHARTDATE
27      charttime: CHARTTIME
28      storetime: STORETIME
29      category: CATEGORY
30      description: DESCRIPTION
31      cgid: CGID
32      iserror: ISERROR
33      text: TEXT
34      icd9_code: ICD9_CODE
35      labels: LABELS
36   dataset_splitting_method:
37     name: caml_official_split
38     params:
39      hadm_dir: *static_dir
40      train_hadm_ids_name: train_full_split.json
41      val_hadm_ids_name: val_full_split.json
42      test_hadm_ids_name: test_full_split.json
43   clinical_note_preprocessing:
44     to_lower:
45       perform: true
46     remove_punctuation:
47       perform: true
48     remove_numeric:
49       perform: true
50     replace_numerics_with_letter: null
51   remove_stopwords:
52     perform: true
53     params:
54      stopwords_file_path: null
55      remove_common_medical_terms: true
56   stem_or_lemmatize:
57     perform: true
58     params:
59      stemmer_name: nltk.WordNetLemmatizer
60   truncate:
61     perform: false
62   incorrect_code_loading: false
63   count_duplicate_codes: false
64   code_preprocessing:
65     top_k: 0 # enter 0 for all codes
66     code_type: both
67     add_period_in_correct_pos:
68       perform: true
69   train_embed_with_all_split: false
70   tokenizer:
71     name: spacetokenizer
72     params: null
73   embedding:
74     name: word2vec
75     params:
76      embedding_dir: *word2vec_dir
77      pad_token: "<pad>"
78      unk_token: "<unk>"
79      word2vec_params:
80       vector_size: 100
81       min_count: 3
82     epochs: 5

```

Figure 4: The YAML config file for preprocessing the MIMIC-III full dataset.

isting datasets and key models, there is a minor difference from the CAML’s preprocessing, specifically in training vocabulary and embeddings, that may affect the results. In our preprocessing, the vocabulary and embeddings are trained together from Gensim’s word2vec training, which means

| Model       |      | Macro AUC   | Micro AUC   | Macro F1      | Micro F1    | P@8         | P@15        |
|-------------|------|-------------|-------------|---------------|-------------|-------------|-------------|
| CNN         | Repr | 0.833±0.003 | 0.974±0.000 | 0.027±0.005   | 0.419±0.006 | 0.612±0.004 | 0.467±0.001 |
|             | Orig | 0.806       | 0.969       | 0.042         | 0.419       | 0.581       | 0.443       |
| CAML        | Repr | 0.880±0.003 | 0.983±0.000 | 0.057±0.000   | 0.502±0.002 | 0.698±0.002 | 0.548±0.001 |
|             | Orig | 0.895       | 0.986       | 0.088         | 0.539       | 0.709       | 0.561       |
| MultiResCNN | Repr | 0.905±0.003 | 0.986±0.000 | 0.076±0.002   | 0.551±0.005 | 0.738±0.003 | 0.586±0.003 |
|             | Orig | 0.910±0.002 | 0.986±0.001 | 0.085±0.007   | 0.552±0.005 | 0.734±0.002 | 0.584±0.001 |
| DCAN        | Repr | 0.837±0.005 | 0.977±0.001 | 0.063±0.002   | 0.527±0.002 | 0.721±0.001 | 0.572±0.001 |
|             | Orig |             |             | Not available |             |             |             |
| TransICD    | Repr | 0.882±0.010 | 0.982±0.001 | 0.059±0.008   | 0.495±0.005 | 0.663±0.007 | 0.521±0.006 |
|             | Orig |             |             | Not available |             |             |             |
| Fusion      | Repr | 0.910±0.003 | 0.986±0.000 | 0.076±0.007   | 0.555±0.008 | 0.744±0.003 | 0.588±0.003 |
|             | Orig | 0.915       | 0.987       | 0.083         | 0.554       | 0.736       | N/A         |

Table 5: Reproduced test set results on the MIMIC-III full (old) dataset. For each model, the upper row (Repr) shows the reproduction results in mean±standard deviation, and the lower row (Orig) shows the results in the original papers.

| Model       |      | Macro AUC   | Micro AUC   | Macro F1    | Micro F1    | P@5         |
|-------------|------|-------------|-------------|-------------|-------------|-------------|
| CNN         | Repr | 0.892±0.003 | 0.920±0.003 | 0.583±0.006 | 0.652±0.008 | 0.627±0.007 |
|             | Orig | 0.876       | 0.907       | 0.576       | 0.625       | 0.620       |
| CAML        | Repr | 0.865±0.017 | 0.899±0.008 | 0.495±0.035 | 0.593±0.020 | 0.597±0.016 |
|             | Orig | 0.875       | 0.909       | 0.532       | 0.614       | 0.609       |
| MultiResCNN | Repr | 0.898±0.006 | 0.928±0.003 | 0.590±0.012 | 0.666±0.013 | 0.638±0.005 |
|             | Orig | 0.899±0.004 | 0.928±0.002 | 0.606±0.011 | 0.670±0.003 | 0.641±0.001 |
| DCAN        | Repr | 0.915±0.002 | 0.938±0.001 | 0.614±0.001 | 0.690±0.002 | 0.653±0.004 |
|             | Orig | 0.902±0.006 | 0.931±0.001 | 0.615±0.007 | 0.671±0.001 | 0.642±0.002 |
| TransICD    | Repr | 0.895±0.003 | 0.924±0.002 | 0.541±0.010 | 0.637±0.003 | 0.617±0.005 |
|             | Orig | 0.894±0.001 | 0.923±0.001 | 0.562±0.004 | 0.644±0.003 | 0.617±0.003 |
| Fusion      | Repr | 0.904±0.002 | 0.930±0.001 | 0.606±0.009 | 0.677±0.003 | 0.640±0.001 |
|             | Orig | 0.909       | 0.933       | 0.619       | 0.674       | 0.647       |

Table 6: Reproduced test set results on the MIMIC-III top-50 (old) dataset. For each model, the upper row (Repr) shows the reproduction results in mean±standard deviation, and the lower row (Orig) shows the results in the original papers.

that rare words in the corpus are replaced with the UNK token before training word2vec. In CAML’s preprocessing, the embeddings are trained without replacing UNK tokens, and later, the embeddings of the frequent words are extracted. Also, in our code, only the train corpus is used to train the embedding, while the CAML’s code uses the whole corpus. Furthermore, when choosing words for the vocabulary, CAML’s code counts the number of documents, i.e., discharge summary note, that each word appears in, while our code uses the total

occurrences of each word. Here, both codes use only the train corpus.

## D More Attribution Scores of MIMIC-III

Table 7~10 show more examples of interpretability visualization. When the model predicted an ICD code correctly, then the relevant part of the input text is attributed. The cases when a model does not predicted are the second and third row of Table 8.

Integrated Gradients for **428.0** (Congestive heart failure unspecified), HADM\_ID=158682

|             |                                                                                                         |
|-------------|---------------------------------------------------------------------------------------------------------|
| CNN         | hypoventilation syndrome chronic <b>diastolic heart failure</b> hypothyroidism irritable bowel syndrome |
| CAML        | hypoventilation syndrome chronic <b>diastolic heart failure</b> hypothyroidism irritable bowel syndrome |
| MultiResCNN | hypoventilation syndrome chronic <b>diastolic heart failure</b> hypothyroidism irritable bowel syndrome |
| DCAN        | hypoventilation syndrome chronic <b>diastolic heart failure</b> hypothyroidism irritable bowel syndrome |
| TransICD    | obes hypoventil syndrom chronic <b>diastol heart failur</b> hypothyroid irrit bowel syndrom vitamin     |
| Fusion      | hypoventilation syndrome chronic <b>diastolic heart failure</b> hypothyroidism irritable bowel syndrome |

Table 7: Integrated gradients of various models on a fixed input and a fixed ICD code

Integrated Gradients for **285.9** (Anemia, unspecified), HADM\_ID=100408

|             |                                                                                           |
|-------------|-------------------------------------------------------------------------------------------|
| CNN         | p mv repair htn lipid chronic <b>anemia</b> persistent afib chf arthritis                 |
| CAML        | physician name9 pre information name9 pre name3 lf r division cardiothoracic              |
| MultiResCNN | cardiothoracic allergy recorded known <b>allergy</b> drug attending name3 lf asymptomatic |
| DCAN        | p mv repair htn lipid chronic <b>anemia</b> persistent afib chf arthritis                 |
| TransICD    | p mv repair htn lipid chronic <b>anemia</b> persist afib chf arthriti tonsillectomi       |
| Fusion      | p mv repair htn lipid chronic <b>anemia</b> persistent afib chf arthritis                 |

Table 8: Integrated gradients of various models on a fixed input and a fixed ICD code

Integrated Gradients of **Fusion**, HADM\_ID=148372

96.04 (Insertion of endotracheal tube)

unsuccessfully repeat abg paco2 ph **intubated** arterial line finally placed successfully

38.91 (Arterial catheterization)

repeat abg paco2 ph **intubated** arterial line finally placed successfully extubated

427.31 (Atrial fibrillation)

perioperative pe anticoagulation **atrial fibrillation** anticoagulation hypertension diabetes type

250.00 (Diabetes mellitus without mention of complication, type ii or unspecified type)

fibrillation anticoagulation hypertension **diabetes** type ii obstructive sleep apnea hypercholesterolemia

401.9 (Unspecified essential hypertension)

anticoagulation atrial fibrillation anticoagulation **hypertension** diabetes type ii obstructive sleep

Table 9: Integrated gradients of Fusion for various ICD codes on a fixed input

Integrated Gradients of **MultiResCNN**, HADM\_ID=135796

414.01 (Coronary atherosclerosis of native coronary artery)

niacin attending name3 lf **cad vessel cad** aortic stenosis toxic multinodular goiter

427.31 (Atrial fibrillation)

operative dysphagia post operative **atrial fibrillation** h 1st degree av block p peg

96.6 (Enteral infusion of concentrated nutritional substances)

ir post pyloric tube placed **feeding** eventually **peg** placed picc placed pt screened

38.93 (Venous catheterization, not elsewhere classified)

placed feeding eventually peg placed **picc** placed pt screened rehab c rehad

584.9 (Acute renal failure, unspecified)

protection mri brain performed cu **arf** elevation creatinine pt subsequently reintubated

Table 10: Integrated gradients of Fusion for various ICD codes on a fixed input
